# Supplementary material
Source: publisher site journal article supplement (https://www.dovepress.com/article/245801)

**Supplementary Figure 1.** Expression of integrin heterodimers. hMSC expression of integrin heterodimers grown on tissue culture polystyrene (Top) and low oxygen form of graphene (Bottom) by flow cytometry. Human MSCs were stained with the indicated primary antibodies followed by fluorescently conjugated secondary antibodies and then analyzed for expression by flow cytometry. Colored open histograms represent reactivity with the indicated antibodies; black open histograms indicate isotype matched controls for each antibody.


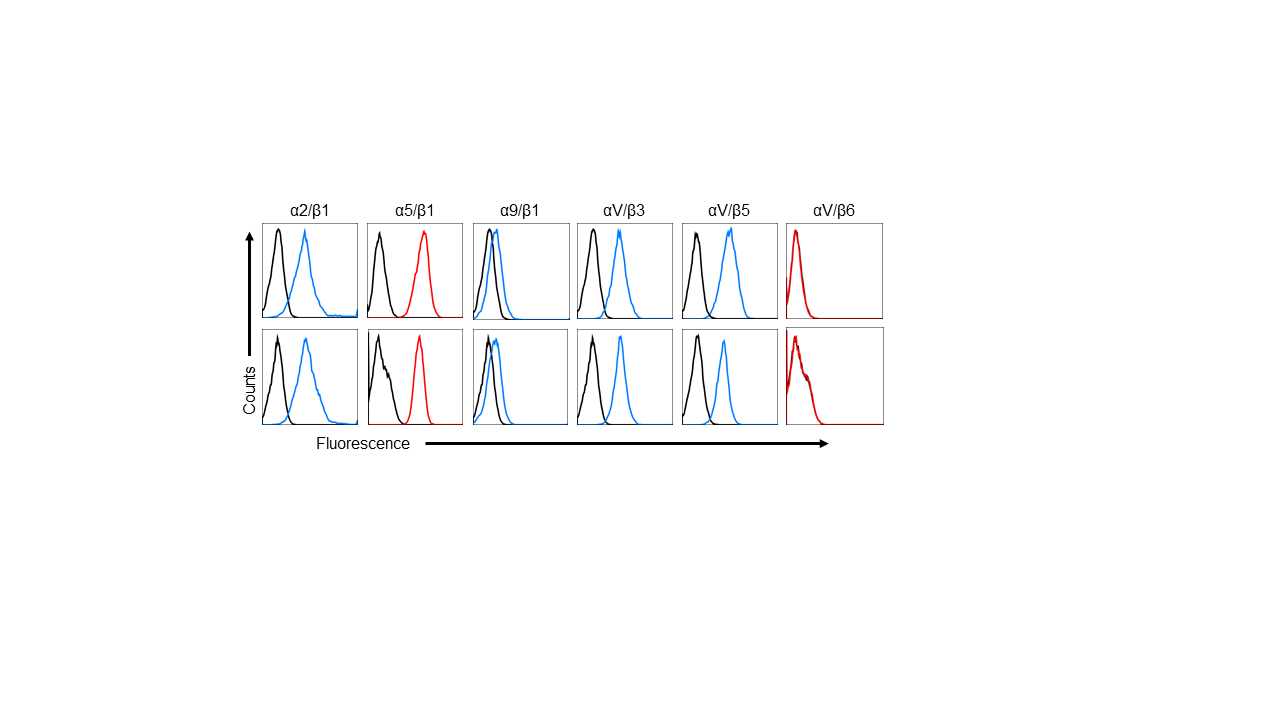

Supplement: Supplementary file 1 [file get_supplementary_file.php]
